# Supplementary material for: Rare-earth metal complexes having an unusual indolyl-1,2-dianion through C–H activation with a novel η1:(μ2–η1:η1) bonding with metals
Source: Royal Society of Chemistry journal article supplement (doi:10.1039/c2cc36045d), 2012-01-01
Supplement: c2cc36045d.pdf [file c2cc36045d.pdf]

**Supporting Information for:**  
**Rare-earth metal complexes having an unusual**  
**indolyl-1,2-dianion through C-H activation with a novel**  
 **$\eta^1:(\mu_2-\eta^1:\eta^1)$  bonding with metals**

Xiancui Zhu,<sup>a</sup> Shuangliu Zhou,<sup>a</sup> Shaowu Wang,<sup>\*,a,b</sup> Yun Wei,<sup>a</sup> Lijun Zhang,<sup>a</sup> Fenhua Wang,<sup>a</sup>  
Shaoyin Wang,<sup>a,c</sup> and Zhijun Feng<sup>a</sup>

<sup>a</sup> Anhui Laboratory of Molecule-Based Materials, Institute of Organic Chemistry, School of Chemistry and Materials Science, Anhui Normal University, Wuhu, Anhui 241000, P. R. China. Fax: +86-553-3883517; Tel: +86-553-5910015; E-mail: swwang@mail.ahnu.edu.cn

<sup>b</sup> State Key Laboratory of Organometallic Chemistry, Shanghai Institute of Organic Chemistry, Shanghai 200032, P. R. China. E-mail: swwang@mail.ahnu.edu.cn

<sup>c</sup> Department of Chemistry, Wannan Medical College, Wuhu, Anhui 241003, P. R. China

**Table of Contents**

|                                                                |           |
|----------------------------------------------------------------|-----------|
| <b>1. General Information.....</b>                             | <b>02</b> |
| <b>2. Preparations of 1– 7.....</b>                            | <b>02</b> |
| <b>3. Molecular Structures of the Complexes.....</b>           | <b>05</b> |
| <b>4. X-ray crystallography and Crystallographic Data.....</b> | <b>07</b> |

**General Information.** All syntheses and manipulations of air- and moisture-sensitive materials were performed under dry argon and oxygen-free atmosphere using standard Schlenk techniques or a glovebox. All solvents were refluxed and distilled over sodium benzophenone ketyl under argon prior to use unless otherwise noted.  $[(\text{Me}_3\text{Si})_2\text{N}]_3\text{RE}^{\text{III}}(\mu\text{-Cl})\text{Li}(\text{THF})_3$  (RE = Y, Yb),<sup>1</sup> 3-(<sup>t</sup>Bu-N=CH)C<sub>8</sub>H<sub>5</sub>NH,<sup>2</sup> 3-(<sup>t</sup>Bu-NHCH<sub>2</sub>)C<sub>8</sub>H<sub>5</sub>NH,<sup>3</sup> (2,6-<sup>i</sup>Pr<sub>2</sub>C<sub>6</sub>H<sub>3</sub>)NHC(H)=N(2,6-<sup>i</sup>Pr<sub>2</sub>C<sub>6</sub>H<sub>3</sub>)<sup>4</sup> were prepared according to literature methods. Elemental analyses data were obtained on a Perkin-Elmer 2400 Series II elemental analyzer. <sup>1</sup>H NMR and <sup>13</sup>C NMR spectra for analyses of compounds were recorded on a Bruker AV-300 NMR spectrometer (300 MHz for <sup>1</sup>H; 75.0 MHz for <sup>13</sup>C in C<sub>6</sub>D<sub>6</sub> for lanthanide complexes. Chemical shifts ( $\delta$ ) were reported in ppm. *J* values are reported in Hz. IR spectra were recorded on a Shimadzu FTIR-8400s spectrometer (KBr pellet).

### Preparation of

$\{[\eta^1:(\mu_2-\eta^1):\eta^1]:\eta^1\text{-3-(t-BuN=CH)C}_8\text{H}_4\text{N}]\text{Y}_2(\mu_2\text{-Cl})_2(\text{THF})[\text{N}(\text{SiMe}_3)_2](\eta^1:\eta^1\text{-}[\mu\text{-}\eta^5:\eta^2\text{-3-(t-BuN=CH)C}_8\text{H}_5\text{N}]_2\text{Li})\}_2$  (**1**)

To a toluene (10.0 mL) solution of 3-(<sup>t</sup>Bu-N=CH)C<sub>8</sub>H<sub>5</sub>NH (0.41 g, 2.03 mmol) was added a toluene (20.0 mL) solution of  $[(\text{Me}_3\text{Si})_2\text{N}]_3\text{Y}^{\text{III}}(\mu\text{-Cl})\text{Li}(\text{THF})_3$  (1.12 g, 1.35 mmol) at room temperature. After the reaction mixture was heated to reflux for 24 h, the color of the solution was gradually changed from white to redish green. The solvent was evaporated under reduced pressure. The residue was extracted with *n*-hexane (2×10 mL). The combined extractions were concentrated to about 10.0 mL. The light yellow crystals were obtained at 0 °C for several days (0.39 g, 53 % yield). m.p. 201 °C (dec.). Anal. Calc. for C<sub>49</sub>H<sub>70</sub>Cl<sub>2</sub>LiN<sub>7</sub>OSi<sub>2</sub>Y<sub>2</sub>·2C<sub>6</sub>H<sub>14</sub>: C, 58.27; H, 7.86; N, 7.80. Found: C, 58.05; H, 7.93; N, 7.85.  $\delta_{\text{H}}$  (300 MHz, C<sub>6</sub>D<sub>6</sub>, ppm): 8.59 (s, 3H, N=CH), 8.34 (d, 2H, *J* = 8.01 Hz), 7.98 (s, 3H), 7.62 (m, 3H), 7.33 (m, 3H), 7.10 (m, 3H), 3.31 (s, 4H, -CH<sub>2</sub>O), 1.40 (s, 4H, -CH<sub>2</sub>), 0.94 (s, 27H, C(CH<sub>3</sub>)<sub>3</sub>), 0.61 (s, 9H, Si(CH<sub>3</sub>)<sub>3</sub>), 0.09 (s, 9H, Si(CH<sub>3</sub>)<sub>3</sub>).  $\delta_{\text{C}}$  (75 MHz, C<sub>6</sub>D<sub>6</sub>, ppm): 157.4 (N=CH), 139.8, 129.0, 126.3, 125.4, 121.9, 121.6, 118.5, 115.5, 56.2 (C(CH<sub>3</sub>)<sub>3</sub>), 29.6 (C(CH<sub>3</sub>)<sub>3</sub>), 5.1, 2.3 (SiMe<sub>3</sub>). IR (KBr pellet, cm<sup>-1</sup>): 2926w, 2866w, 1627s, 1531s, 1456s, 1381m, 1354w, 1236s, 1205s, 1138s, 1116s, 933m, 829w, 742w, 574w, 420w.

### Preparation of

$\{[\eta^1:(\mu_2-\eta^1):\eta^1]:\eta^1\text{-3-(t-BuN=CH)C}_8\text{H}_4\text{N}]\text{Yb}_2(\mu_2\text{-Cl})_2(\text{THF})[\text{N}(\text{SiMe}_3)_2](\eta^1:\eta^1\text{-}[\mu\text{-}\eta^5:\eta^2\text{-3-(t-BuN=CH)C}_8\text{H}_5\text{N}]_2\text{Li})\}_2$  (**2**)

This compound was isolated as red crystals in 58% yield by treatment of  $[(\text{Me}_3\text{Si})_2\text{N}]_3\text{Yb}^{\text{III}}(\mu\text{-Cl})\text{Li}(\text{THF})_3$  (1.34 g, 1.47 mmol) with 3-(<sup>t</sup>Bu-N=CH)C<sub>8</sub>H<sub>5</sub>NH (0.44 g, 2.20 mmol) following procedures similar to those used for the preparation of **1**. m.p. 185 °C (dec.). Anal. Calc. for C<sub>49</sub>H<sub>70</sub>Cl<sub>2</sub>LiN<sub>7</sub>OSi<sub>2</sub>Yb<sub>2</sub>·2C<sub>6</sub>H<sub>14</sub>: C, 51.39; H, 6.93; N, 6.88. Found: C, 51.12; H, 7.38; N, 7.15. IR (KBr pellet, cm<sup>-1</sup>): 2966m, 2868w, 1629s, 1531s, 1454m, 1359w, 1236m, 1205m, 1116s, 1010s, 933s, 837w, 742s, 570w, 422w.

### Preparation of $\{\eta^4:\eta^2:\eta^1\text{-3-(t-BuN=CH)C}_8\text{H}_5\text{N}]\text{Li}_2[\text{N}(\text{SiMe}_3)_2]\}_2$ (**3**)

To a toluene (10.0 mL) solution of 3-(<sup>t</sup>Bu-N=CH)C<sub>8</sub>H<sub>5</sub>NH (0.49 g, 2.47 mmol) was added a toluene (20.0 mL) solution of LiN(SiMe<sub>3</sub>)<sub>2</sub> (0.83 g, 4.94 mmol) at room temperature. After the reaction mixture was stirred at reflux for 24 h, the solvent was evaporated under reduced pressure. The residue was extracted with *n*-hexane (10 mL). The colorless crystals were obtained upon

standing the solution at room temperature for 12 h (0.64 g, 69%). m.p. 208 °C. Anal. Calc. for  $C_{38}H_{66}Li_4N_6Si_4$ : C, 61.09; H, 8.90; N, 11.25. Found: C, 61.15; H, 8.86; N, 11.17.  $\delta_H$  (300 MHz,  $C_6D_6$ , ppm): 8.62 (s, 1H, N=CH), 8.23 (s, 1H), 8.09 (d, 1H,  $J = 7.83$  Hz), 7.81 (d, 1H,  $J = 7.44$  Hz), 7.41 (d, 1H,  $J = 7.41$  Hz), 7.31 (d, 1H,  $J = 7.20$  Hz), 1.03 (s, 9H,  $C(CH_3)_3$ ), 0.09 (s, 9H,  $Si(CH_3)_3$ ), 0.01 (s, 9H,  $Si(CH_3)_3$ ).  $\delta_C$  (75.0 MHz,  $C_6D_6$ , ppm): 158.0 (N=CH), 149.0, 137.0, 129.2, 122.2, 121.1, 118.2, 117.8, 112.1, 56.3 ( $C(CH_3)_3$ ), 29.7 ( $C(CH_3)_3$ ), 4.8, 2.3 ( $SiMe_3$ ). IR (KBr pellet,  $cm^{-1}$ ): 2966m, 2349m, 1629s, 1581m, 1531s, 1456s, 1381m, 1359w, 1236m, 1205m, 1138s, 1066m, 1010s, 933m, 829w, 605w, 574w.

#### Preparation of $[\mu\{-\{\eta^1:\eta^1:\eta^1:\eta^1\text{-3-(t-BuNHCH}_2\text{)Ind}\}_2Li\}Y[N(SiMe_3)_2]_2]$ (4)

This compound was isolated as white crystals in 45% yield by treatment of  $[(Me_3Si)_2N]_3Y^{III}(\mu\text{-Cl})Li(THF)_3$  (0.89 g, 1.07 mmol) with 3-(<sup>t</sup>Bu-NHCH<sub>2</sub>)C<sub>8</sub>H<sub>5</sub>NH (0.33 g, 1.61 mmol) following procedures similar to those used for the preparation of **1**. m.p. 212 °C (dec.). Anal. Calc. for  $C_{38}H_{70}LiN_6Si_4Y \cdot 2THF$ : C, 57.35; H, 9.00; N, 8.72. Found: C, 57.26; H, 8.54; N, 8.81.  $\delta_H$  (300 MHz,  $C_6D_6$ , ppm): 7.79 (m, 2H), 7.35-6.90 (m, 8H), 3.62 (d, 4H,  $J = 7.62$  Hz, -CH<sub>2</sub>), 1.18 (s, 18H,  $C(CH_3)_3$ ), 0.22 (s, 18H,  $Si(CH_3)_3$ ), 0.14 (s, 18H,  $Si(CH_3)_3$ ).  $\delta_C$  (75 MHz,  $C_6D_6$ , ppm): 145.2, 134.1, 121.4, 120.8, 118.1, 117.6, 110.2, 109.9, 45.7 ( $C(CH_3)_3$ ), 29.4 (-CH<sub>2</sub>), 21.9 ( $C(CH_3)_3$ ), 1.1, 0.15 ( $SiMe_3$ ). IR (KBr pellet,  $cm^{-1}$ ): 2962m, 2385s, 2349s, 1456m, 1354m, 1336m, 1261w, 1091m, 1020w, 864m, 800w, 740w.

#### Preparation of $[\mu\{-\{\eta^1:\eta^1:\eta^1:\eta^1\text{-3-(t-BuNHCH}_2\text{)Ind}\}_2Li\}Yb[N(SiMe_3)_2]_2]$ (5)

This compound was isolated as pale yellow crystals in 50% yield by treatment of  $[(Me_3Si)_2N]_3Yb^{III}(\mu\text{-Cl})Li(THF)_3$  (1.21 g, 1.33 mmol) with 3-(<sup>t</sup>Bu-NHCH<sub>2</sub>)C<sub>8</sub>H<sub>5</sub>NH (0.40 g, 1.99 mmol) following procedures similar to those used for the preparation of **1**. m.p. 205 °C (dec.). Anal. Calc. for  $C_{38}H_{70}LiN_6Si_4Yb \cdot 2THF$ : C, 52.74; H, 8.27; N, 8.02. Found: C, 53.05; H, 7.93; N, 7.85. IR (KBr pellet,  $cm^{-1}$ ): 2962m, 2904s, 2349s, 1456m, 1363m, 1261w, 1182m, 1095w, 1018w, 933m, 800m, 738w.

#### Preparation of $\{[3\text{-}(t\text{-BuN=CH)C}_8\text{H}_5\text{N}]_2Y[(2,6\text{-}^i\text{Pr}_2\text{C}_6\text{H}_3\text{N})_2(\text{CH})](\text{THF})_2\}$ (6)

To a toluene (10.0 mL) solution of **1** (0.58 g, 0.26 mmol) was added a toluene (10.0 mL) solution of (2,6-<sup>i</sup>Pr<sub>2</sub>C<sub>6</sub>H<sub>3</sub>)NHC(H)=N(2,6-<sup>i</sup>Pr<sub>2</sub>C<sub>6</sub>H<sub>3</sub>) (0.10 g, 0.26 mmol) at room temperature. The reaction mixture was heated to reflux for 12 h. Then the solvent was evaporated under reduced pressure. The residue was extracted with 10 mL *n*-hexane. The colorless crystals were obtained at 0 °C for several days (0.13 g, 45 % yield). m.p. 158-159 °C. Anal. Calc. for  $C_{59}H_{81}N_6O_2Y \cdot C_7H_8$ : C, 72.90; H, 8.25; N, 7.73. Found: C, 72.99; H, 8.28; N, 7.79. <sup>1</sup>H NMR (300 MHz,  $C_6D_6$ , ppm):  $\delta$  9.08 (s, 1H, NCHN), 8.91 (d, 2H,  $J = 6.96$  Hz), 8.53 (s, 2H, N=CH), 8.02 (d, 2H,  $J = 7.17$  Hz), 7.47-7.02 (m, 12H), 3.95-3.90 (m, 4H, -CH(CH<sub>3</sub>)<sub>2</sub>), 3.11 (s, 8H, -CH<sub>2</sub>O), 1.56-1.49 (m, 24H), 1.42 (s, 8H, -CH<sub>2</sub>), 1.26-1.24 (m, 18H). <sup>13</sup>C NMR (75 MHz,  $C_6D_6$ , ppm):  $\delta$  171.8 (NCHN), 147.8 (N=CH), 144.6, 142.5, 133.6, 128.6, 124.5, 122.5, 122.2, 120.8, 120.2, 119.0, 115.7, 112.8, 70.2, 55.3, 30.7, 29.3, 27.5, 25.1, 23.5, 22.2, 21.8, 13.1. IR (KBr pellet,  $cm^{-1}$ ): 1664s, 1625m, 1585w, 1529m, 1456s, 1354w, 1286m, 1236m, 1118w, 1066s, 798m, 742w.

#### Preparation of $\{[3\text{-}(t\text{-BuN=CH)C}_8\text{H}_5\text{N}]_2Yb[(2,6\text{-}^i\text{Pr}_2\text{C}_6\text{H}_3\text{N})_2(\text{CH})](\text{THF})_2\}$ (7)

This compound was isolated as red crystals in 39% yield by treatment of **2** (0.74 g, 0.29 mmol) with (2,6-<sup>i</sup>Pr<sub>2</sub>C<sub>6</sub>H<sub>3</sub>)NHC(H)=N(2,6-<sup>i</sup>Pr<sub>2</sub>C<sub>6</sub>H<sub>3</sub>) (0.11 g, 0.29 mmol) following procedures similar to

those used for the preparation of **6**. m.p. 147-149 °C. Anal. Calc. for  $C_{59}H_{81}N_6O_2Yb$ : C, 66.65; H, 7.56; N, 7.79. Found: C, 66.78; H, 7.75; N, 7.88. IR (KBr pellet,  $cm^{-1}$ ): 1664s, 1626m, 1529m, 1454s, 1354w, 1286m, 1236m, 1138m, 1058w, 933w, 798m, 742m, 574w.

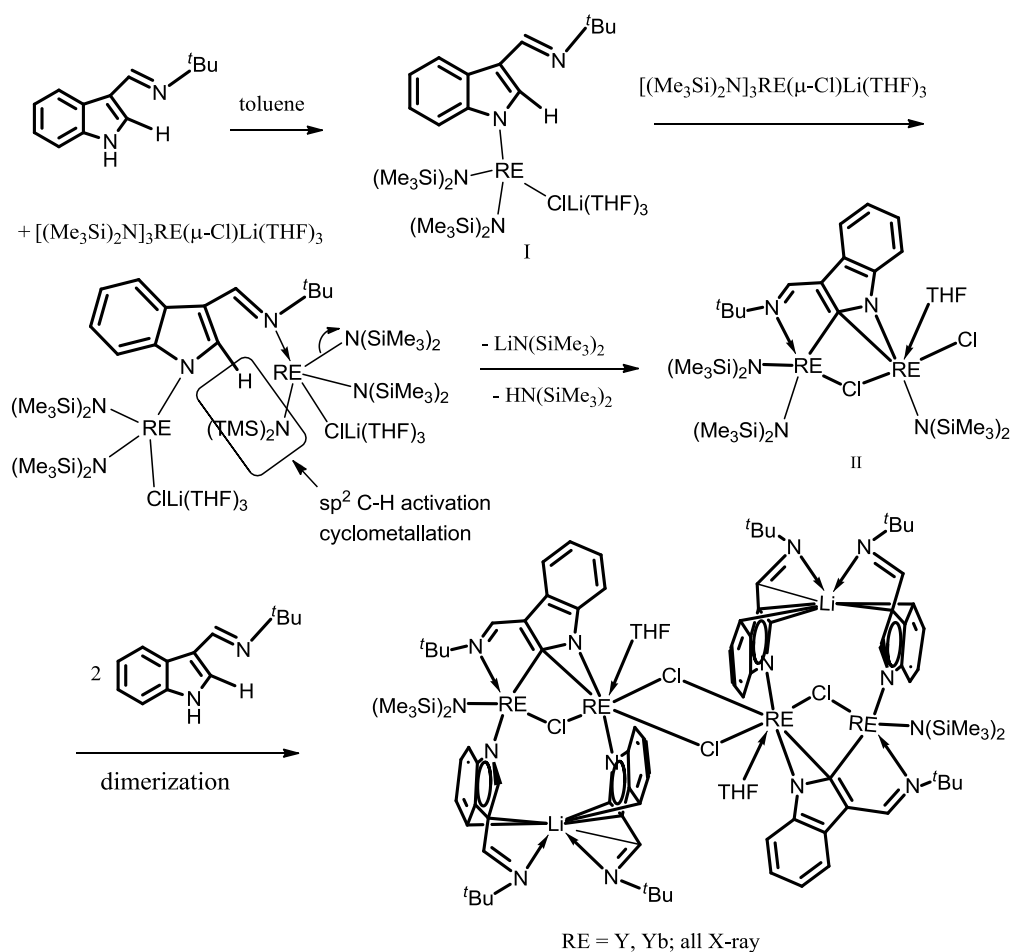

**Scheme S1.** Proposed Pathway for the formation of complexes **1** and **2**

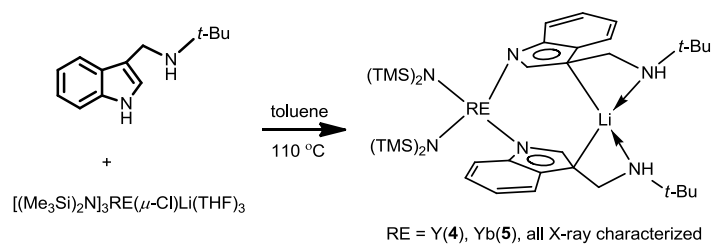

**Scheme S2** Reactions of 3-(*t*-butylaminomethylene)indole with rare-earth metal amides

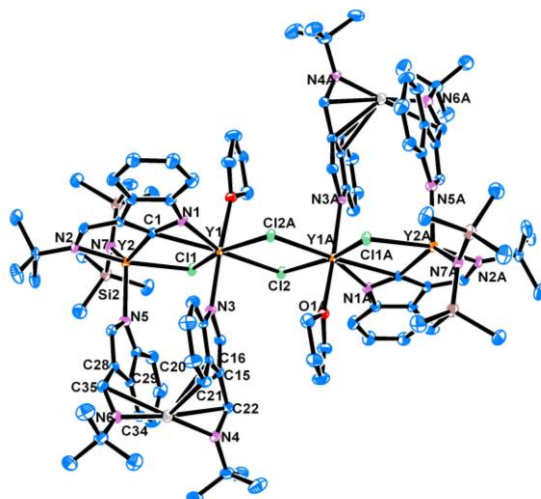

**Fig. S1.** Structure of complex **1**. Hydrogen atoms were omitted for clarity. Selected bond distances (Å) and angles (°): Y(1)-N(1) 2.216(7), Y(1)-N(3) 2.344(7), Y(1)-O(1) 2.354(6), Y(1)-Cl(1) 2.662(2), Y(1)-C(1) 2.665(8), Y(1)-Cl(2) 2.741(2), Y(2)-N(7) 2.238(7), Y(2)-N(5) 2.305(7), Y(2)-N(2) 2.385(7), Y(2)-C(1) 2.551(8), Y(2)-Cl(1), 2.670(2), Li(1)-N(6) 1.99(2), Li(1)-N(4) 2.01(2), Li(1)-C(22) 2.53(2), Li(1)-C(15) 2.55(2), Li(1)-C(16) 2.56(2), Li(1)-C(21) 2.60(2), Li(1)-C(35) 2.61(2), Li(1)-C(34) 2.67(2), Li(1)-C(29) 2.74(2), Li(1)-C(28), 2.76(2), Y(1)-Cl(1)-Y(2) 92.01(7), N(3)-Y(1)-Cl(2) 89.51(18), N(7)-Y(2)-N(5) 119.3(3), N(5)-Y(2)-Cl(1) 90.1(2).

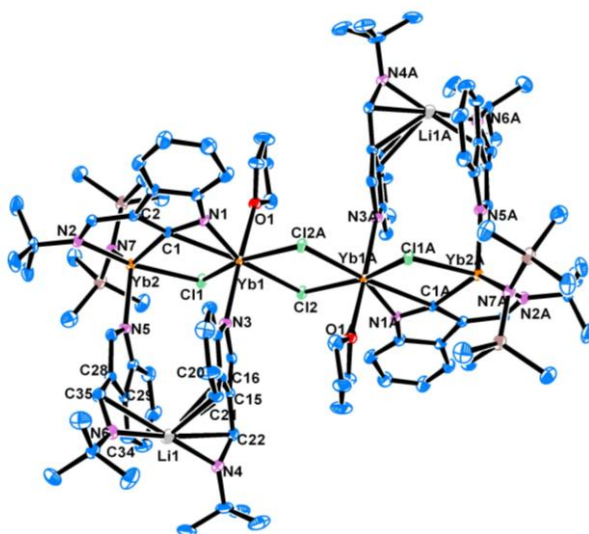

**Fig. S2.** Structure of complex **2**. Hydrogen atoms were omitted for clarity. Selected bond distances (Å) and angles (°): Yb(1)-N(1) 2.182(9), Yb(1)-N(3) 2.303(10), Yb(1)-O(1) 2.345(9), Yb(1)-Cl(1) 2.632(3), Yb(1)-C(1) 2.654(10), Yb(1)-Cl(2) 2.702(3), Yb(2)-N(7) 2.201(9), Yb(2)-N(5) 2.267(10), Yb(2)-N(2) 2.371(9), Yb(2)-C(1) 2.506(12), Yb(2)-Cl(1), 2.641(3), Li(1)-N(6) 2.00(3), Li(1)-N(4) 2.00(3), Li(1)-C(22) 2.50(3), Li(1)-C(15) 2.59(3), Li(1)-C(16) 2.55(3), Li(1)-C(21) 2.67(4), Li(1)-C(35) 2.63(3), Li(1)-C(34) 2.69(4), Li(1)-C(29) 2.73(4), Li(1)-C(28), 2.78(3), Yb(1)-Cl(1)-Yb(2) 92.42(9), N(3)-Yb(1)-Cl(2) 89.1(3), N(7)-Yb(2)-N(5) 119.4(4), N(5)-Yb(2)-Cl(1) 90.4(3).

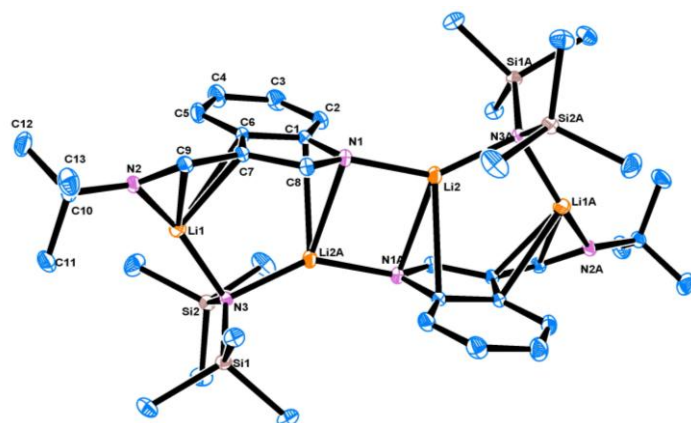

**Fig. S3.** Structure of complex **3**. Hydrogen atoms were omitted for clarity. Selected bond distances (Å) and angles (°): Li(1)-N(3) 1.962(4), Li(1)-N(2) 2.007(4), Li(1)-C(9) 2.498(5), Li(1)-C(7) 2.458(5), Li(1)-C(6) 2.464(4), N(3)-Li(2A) 2.028(4), N(1)-Li(2A) 2.598(5), C(1)-Li(2A) 2.669(5), N(2)-C(9) 1.273(3), N(3)-Li(1)-N(2) 147.8(2), N(3A)-Li(2)-N(1A) 126.42(19).

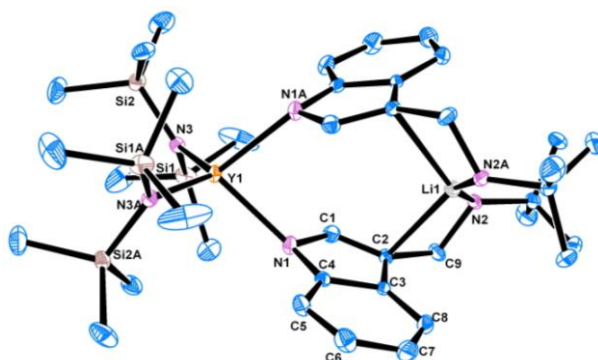

**Fig. S4.** Structure of complex **4**. Hydrogen atoms were omitted for clarity. Selected bond distances (Å) and angles (°): Y(1)-N(3) 2.236(3), Y(1)-N(1) 2.306(4), Li(1)-N(2) 2.061(5), Li(1)-C(2) 2.524(7), N(2)-C(9) 1.479(5), N(1A)-Y(1)-N(1) 83.73(17), N(3A)-Y(1)-N(3) 120.14(16), N(2)-Li(1)-C(2A) 137.8(3), N(2)-Li(1)-N(2A) 149.3(6).

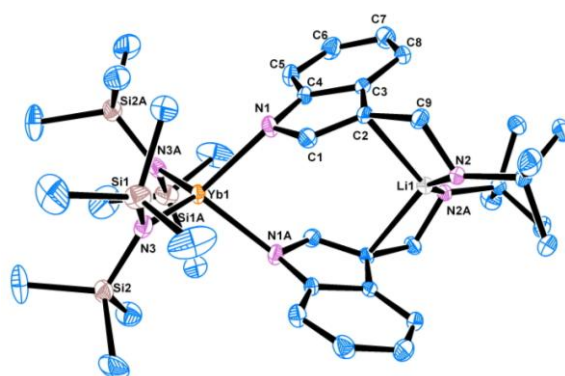

**Fig. S5.** Structure of complex **5**. Hydrogen atoms were omitted for clarity. Selected bond distances (Å) and angles (°): Y(1)-N(3) 2.205(7), Yb(1)-N(1) 2.275(7), N(2)-Li(1) 2.069(8), C(2)-Li(1) 2.499(13), N(2)-C(9) 1.492(10), N(1A)-Yb(1)-N(1) 83.5(4), N(3A)-Yb(1)-N(3) 121.7(4), N(2)-Li(1)-C(2A) 138.0(4), N(2)-Li(1)-N(2A) 147.7(11).



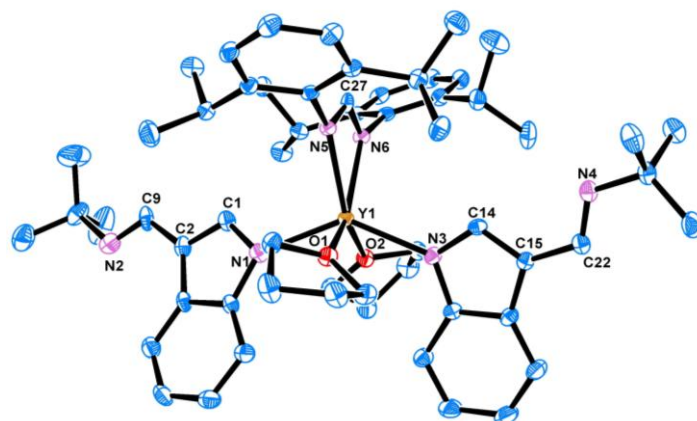

**Fig. S6.** Structure of complex **6**. Hydrogen atoms and solvated toluene molecule were omitted for clarity. Selected bond distances (Å) and angles (°): Y(1)-N(1) 2.288(2), Y(1)-N(3) 2.2843(19), Y(1)-N(5) 2.3682(18), Y(1)-N(6) 2.3580(18), Y(1)-O(1) 2.3540(16), Y(1)-O(2) 2.3589(16), Y(1)-C(27) 2.774(2), N(3)-Y(1)-N(1) 136.48(7), O(1)-Yb(1)-O(2) 134.04(6), N(6)-Y(1)-N(5) 57.43(6).

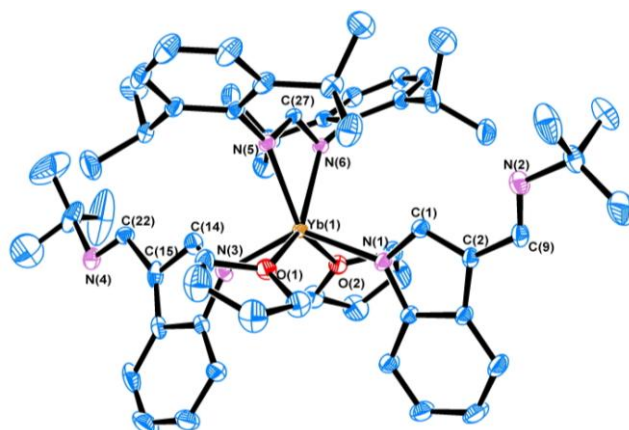

**Fig. S7.** Structure of complex **7**. Hydrogen atoms were omitted for clarity. Selected bond distances (Å) and angles (°): Yb(1)-N(1) 2.249(3), Yb(1)-N(3) 2.250(3), Yb(1)-N(5) 2.336(2), Yb(1)-N(6) 2.339(2), Yb(1)-O(1) 2.331(2), Yb(1)-O(2) 2.339(2), Yb(1)-C(27) 2.730(3), N(3)-Yb(1)-N(1) 134.38(10), O(1)-Yb(1)-O(2) 135.89(9), N(6)-Yb(1)-N(5) 57.59(8).

**Crystal Structure Determinations.** A suitable crystal of complexes **1-7** was each mounted in a sealed capillary. Diffraction was performed on a Bruker SMART CCD area detector diffractometer using graphite-monochromated Mo K $\alpha$  radiation ( $\lambda = 0.71073$  Å). An empirical absorption correction was applied using the SADABS program.<sup>5</sup> All structures were solved by direct methods, completed by subsequent difference Fourier syntheses, and refined anisotropically for all non-hydrogen atoms by full-matrix least-squares calculations on  $F^2$  using the SHELXTL program package.<sup>6</sup> All hydrogen atoms were refined using a riding model. Crystal data and details of the data collection are given in Table 1.

## References

1. (a) S. L. Zhou, S. W. Wang, G. S. Yang, X. Y. Liu, E. H. Sheng, K. H. Zhang, L. Cheng, Z. X.

- Huang, *Polyhedron.*, 2003, **22**, 1019-1024; (b) E. H. Sheng, S. W. Wang, G. S. Yang, S. L. Zhou, K. H. Zhang, L. Cheng, Z. X. Huang, *Organometallics*, 2003, **22**, 684–692.  
 2. K. Kloc, E. Kubicz, J. Mlochowski and L. Syper, *Synthesis*, 1987, 1084-1087.  
 3. El-Saved M. Afsah, *J. Chem. Soc., Perkin. Trans.*, 1984, 1929-1932.  
 4. K. E. Krahulic, G. D. Enright, M. Parvez and R. Roesler, *J. Am. Chem. Soc.*, 2005, **127**, 4142-4143.  
 5. G. M. Sheldrick, SADABS: Program for Empirical Absorption Correction of Area Detector Data, University of Göttingen, Germany, 1996.  
 6. G. M. Sheldrick, SHELXTL 5.10 for Windows NT: Structure Determination Software Programs, Bruker Analytical X-ray Systems, Inc., Madison, WI, 1997.

**Table 1. Crystallographic Data for Complexes 1-7**

| Compound                                        | 1                                                                                                | 2                                                                                                 | 3                                                                              | 4                                                                  | 5                                                                   | 6                                                                                             | 7                                                                |
|-------------------------------------------------|--------------------------------------------------------------------------------------------------|---------------------------------------------------------------------------------------------------|--------------------------------------------------------------------------------|--------------------------------------------------------------------|---------------------------------------------------------------------|-----------------------------------------------------------------------------------------------|------------------------------------------------------------------|
| formula                                         | C <sub>49</sub> H <sub>70</sub> Cl <sub>2</sub> LiN <sub>7</sub> OSi <sub>2</sub> Y <sub>2</sub> | C <sub>49</sub> H <sub>70</sub> Cl <sub>2</sub> LiN <sub>7</sub> OSi <sub>2</sub> Yb <sub>2</sub> | C <sub>38</sub> H <sub>66</sub> Li <sub>4</sub> N <sub>6</sub> Si <sub>4</sub> | C <sub>38</sub> H <sub>70</sub> LiN <sub>6</sub> Si <sub>4</sub> Y | C <sub>38</sub> H <sub>70</sub> LiN <sub>6</sub> Si <sub>4</sub> Yb | C <sub>59</sub> H <sub>81</sub> N <sub>6</sub> O <sub>2</sub> Y·C <sub>7</sub> H <sub>8</sub> | C <sub>59</sub> H <sub>81</sub> N <sub>6</sub> O <sub>2</sub> Yb |
| formula wt                                      | 1084.96                                                                                          | 1253.22                                                                                           | 747.09                                                                         | 819.21                                                             | 903.34                                                              | 1087.34                                                                                       | 1079.34                                                          |
| cryst syst                                      | Triclinic                                                                                        | Triclinic                                                                                         | Triclinic                                                                      | Monoclinic                                                         | Monoclinic                                                          | Triclinic                                                                                     | Triclinic                                                        |
| space group                                     | <i>P</i> -1                                                                                      | <i>P</i> -1                                                                                       | <i>P</i> -1                                                                    | <i>P</i> 2/ <i>c</i>                                               | <i>P</i> 2/ <i>c</i>                                                | <i>P</i> -1                                                                                   | <i>P</i> -1                                                      |
| <i>a</i> (Å)                                    | 15.0187(13)                                                                                      | 15.0250(14)                                                                                       | 9.1116(8)                                                                      | 12.431(2)                                                          | 12.454(3)                                                           | 11.8630(12)                                                                                   | 11.9972(8)                                                       |
| <i>b</i> (Å)                                    | 16.0047(14)                                                                                      | 15.9524(15)                                                                                       | 11.2374(10)                                                                    | 15.176(3)                                                          | 15.076(3)                                                           | 13.3410(14)                                                                                   | 13.3074(9)                                                       |
| <i>c</i> (Å)                                    | 16.6926(14)                                                                                      | 16.6905(16)                                                                                       | 12.0801(11)                                                                    | 15.3466(17)                                                        | 15.519(3)                                                           | 20.967(2)                                                                                     | 21.3606(15)                                                      |
| $\alpha$ (°)                                    | 84.1590(10)                                                                                      | 84.3230(10)                                                                                       | 97.2570(10)                                                                    | 90                                                                 | 90                                                                  | 106.190(6)                                                                                    | 105.7870(10)                                                     |
| $\beta$ (°)                                     | 64.9450(10)                                                                                      | 65.1050(10)                                                                                       | 100.0590(10)                                                                   | 124.166(9)                                                         | 124.822(13)                                                         | 102.549(13)                                                                                   | 102.5530(10)                                                     |
| $\gamma$ (°)                                    | 78.9000(10)                                                                                      | 78.8840(10)                                                                                       | 101.9070(10)                                                                   | 90                                                                 | 90                                                                  | 91.116(7)                                                                                     | 92.6190(10)                                                      |
| Volume (Å <sup>3</sup> )                        | 3565.9(5)                                                                                        | 3560.0(6)                                                                                         | 1174.63(18)                                                                    | 2395.5(7)                                                          | 2392.0(9)                                                           | 3099.2(5)                                                                                     | 3183.2(4)                                                        |
| Z                                               | 2                                                                                                | 2                                                                                                 | 1                                                                              | 2                                                                  | 2                                                                   | 2                                                                                             | 2                                                                |
| <i>D</i> <sub>calcd</sub> (g cm <sup>-3</sup> ) | 1.010                                                                                            | 1.169                                                                                             | 1.056                                                                          | 1.136                                                              | 1.254                                                               | 1.165                                                                                         | 1.126                                                            |
| $\mu$ (mm <sup>-1</sup> )                       | 1.759                                                                                            | 2.750                                                                                             | 0.157                                                                          | 1.348                                                              | 2.085                                                               | 0.987                                                                                         | 1.509                                                            |
| F (000)                                         | 1128                                                                                             | 1252                                                                                              | 404                                                                            | 876                                                                | 938                                                                 | 1164                                                                                          | 1126                                                             |
| $\theta$ range [°]                              | 1.30 to 27.54                                                                                    | 1.30 to 27.58                                                                                     | 1.74 to 25.99                                                                  | 1.98 to 27.52                                                      | 1.99 to 27.64                                                       | 1.63 to 27.94                                                                                 | 1.63 to 27.79                                                    |
| Limiting indices                                | -19<= <i>h</i> <=19                                                                              | -19<= <i>h</i> <=19                                                                               | -11<= <i>h</i> <=10                                                            | -15<= <i>h</i> <=16                                                | -15<= <i>h</i> <=16                                                 | -15<= <i>h</i> <=15                                                                           | -15<= <i>h</i> <=15                                              |
|                                                 | -20<= <i>k</i> <=20                                                                              | -20<= <i>k</i> <=20                                                                               | -13<= <i>k</i> <=13                                                            | -17<= <i>k</i> <=19                                                | -18<= <i>k</i> <=19                                                 | -17<= <i>k</i> <=17                                                                           | -17<= <i>k</i> <=16                                              |
|                                                 | -21<= <i>l</i> <=21                                                                              | -21<= <i>l</i> <=18                                                                               | -14<= <i>l</i> <=14                                                            | -19<= <i>l</i> <=19                                                | -20<= <i>l</i> <=20                                                 | -27<= <i>l</i> <=27                                                                           | 0<= <i>l</i> <=28                                                |
| Reflections                                     | 31129 / 16071                                                                                    | 30653 / 15993                                                                                     | 9138 / 4549                                                                    | 20090 / 5483                                                       | 19741 / 5505                                                        | 40064 / 14725                                                                                 | 14509 / 14509                                                    |
| collected/ unique                               | [ <i>R</i> (int) = 0.0543]                                                                       | [ <i>R</i> (int) = 0.0516]                                                                        | [ <i>R</i> (int) = 0.0211]                                                     | [ <i>R</i> (int) = 0.1383]                                         | [ <i>R</i> (int) = 0.0814]                                          | [ <i>R</i> (int) = 0.0506]                                                                    | [ <i>R</i> (int) = 0.0000]                                       |
| Data/ restraints/<br>parameters                 | 16071 / 48 / 592                                                                                 | 15993 / 24 / 592                                                                                  | 4549 / 0 / 244                                                                 | 5483 / 0 / 240                                                     | 5505 / 0 / 236                                                      | 14725 / 0 / 676                                                                               | 14509 / 46 / 646                                                 |
| GOF                                             | 1.014                                                                                            | 1.029                                                                                             | 1.048                                                                          | 1.087                                                              | 1.009                                                               | 1.161                                                                                         | 0.983                                                            |
| Final <i>R</i> indices                          | <i>R</i> <sub>I</sub> = 0.0888                                                                   | <i>R</i> <sub>I</sub> = 0.0655                                                                    | <i>R</i> <sub>I</sub> = 0.0434                                                 | <i>R</i> <sub>I</sub> = 0.0609                                     | <i>R</i> <sub>I</sub> = 0.0684                                      | <i>R</i> <sub>I</sub> = 0.0501                                                                | <i>R</i> <sub>I</sub> = 0.0326                                   |
| [ <i>I</i> > 2σ( <i>I</i> )]                    | w <i>R</i> <sub>2</sub> = 0.2847                                                                 | w <i>R</i> <sub>2</sub> = 0.2046                                                                  | w <i>R</i> <sub>2</sub> = 0.1204                                               | w <i>R</i> <sub>2</sub> = 0.0833                                   | w <i>R</i> <sub>2</sub> = 0.1418                                    | w <i>R</i> <sub>2</sub> = 0.1142                                                              | w <i>R</i> <sub>2</sub> = 0.0855                                 |
| <i>R</i> indices                                | <i>R</i> <sub>I</sub> = 0.1914                                                                   | <i>R</i> <sub>I</sub> = 0.1450                                                                    | <i>R</i> <sub>I</sub> = 0.0617                                                 | <i>R</i> <sub>I</sub> = 0.1963                                     | <i>R</i> <sub>I</sub> = 0.1321                                      | <i>R</i> <sub>I</sub> = 0.0634                                                                | <i>R</i> <sub>I</sub> = 0.0410                                   |
| (all data)                                      | w <i>R</i> <sub>2</sub> = 0.3462                                                                 | w <i>R</i> <sub>2</sub> = 0.2519                                                                  | w <i>R</i> <sub>2</sub> = 0.1340                                               | w <i>R</i> <sub>2</sub> = 0.1036                                   | w <i>R</i> <sub>2</sub> = 0.1726                                    | w <i>R</i> <sub>2</sub> = 0.1180                                                              | w <i>R</i> <sub>2</sub> = 0.0892                                 |
| largest diff<br>peak/hole (e Å <sup>-3</sup> )  | 1.854 and -0.468                                                                                 | 1.773 and -0.998                                                                                  | 0.260 and -0.195                                                               | 0.410 and -0.372                                                   | 2.063 and -1.036                                                    | 0.697 and -0.841                                                                              | 0.691 and -0.682                                                 |
